# Supplementary material for: Antigen Targeting of Porcine Skin DEC205+ Dendritic Cells
Source: MDPI journal article supplement (doi:10.3390/vaccines10050684), 2022-04-26
Supplement: s1 [file s1]

**Table S1.** Antibodies and dilutions used to flow cytometry staining.

| <b>Antibody</b>                            | <b>Company</b>          | <b>Dilution</b> |
|--------------------------------------------|-------------------------|-----------------|
| Anti CD163 (mouse IgG1)                    | Bio-Rad, United Kingdom | 1:100           |
| Anti CD172a (mouse IgG1)                   | Bio-Rad, United Kingdom | 1:100           |
| Anti CADM1 (chicken IgY)                   | MBL International, USA  | 1:500           |
| Anti CD14 (mouse IgG2b)                    | Bio-Rad, United Kingdom | 1:200           |
| Anti CD3 (mouse IgG1)                      | Southern Biotech, USA   | 1:100           |
| Anti CD21 (mouse IgG1)                     | Southern Biotech, USA   | 1:200           |
| Anti CD8 $\alpha$ (mouse IgG2a)            | Bio-Rad, United Kingdom | 1:200           |
| Anti CD4 $\alpha$ (mouse IgG2b)            | Bio-Rad, United Kingdom | 1:100           |
| Anti DEC205 (mouse x pig IgG1)             | Homemade                | 1:100           |
| Streptavidin PE-conjugated                 | Southern Biotech, USA   | 1:100           |
| BV421-conjugated rat anti-mouse IgG1       | (BioLegend, USA)        | 1:100           |
| A647-conjugated goat anti-chicken IgY      | Invitrogen, USA         | 1:500           |
| FITC-conjugated goat anti-mouse IgG2b      | SouthernBiotech, USA    | 1:100           |
| A647-conjugated goat anti-mouse IgG2b      | Invitrogen, USA         | 1:200           |
| PE-conjugated mouse anti-pig IFN- $\gamma$ | BD Pharmingen, USA      | -               |
