# Supplementary material for: Antigen Targeting of Porcine Skin DEC205+ Dendritic Cells
Source: MDPI journal article supplement (doi:10.3390/vaccines10050684), 2022-04-26
Supplement: s1 [file s1]

Figure 1b

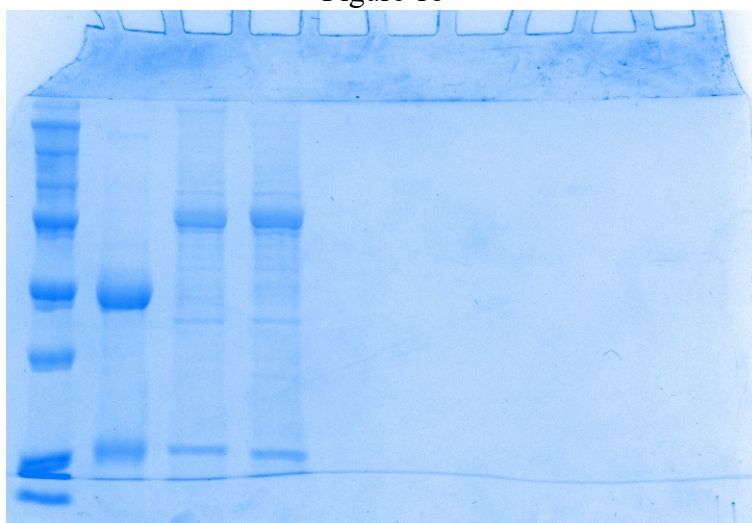

SDS-PAGE at 10% followed by Coomassie blue staining. Line 1: molecular weight ladder. Line 2: rAb ZH9F7. Line 3: rAb ZH9F7\_Cap. Line 4: rAb 7DEU\_Cap.

Figure 1c

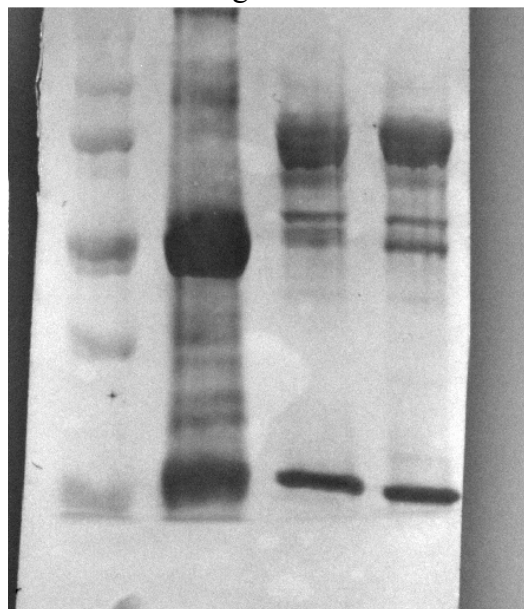

Western blot. Anti-porcine (H+L). Line 1: molecular weight ladder. Line 2: rAb ZH9F7. Line 3: rAb ZH9F7\_Cap. Line 4: rAb 7DEU\_Cap.
