# Supplementary material for: Antigen Targeting of Porcine Skin DEC205+ Dendritic Cells
Source: Vaccines (Basel). 2022 Apr 26;10(5):684. doi: 10.3390/vaccines10050684 (PMC9147619; doi:10.3390/vaccines10050684)
Supplement: Supplementary file 1 [file vaccines-10-00684-s001.zip]

Archive with 8 entries (8 files):
- Original blots and gels.pdf
- Supplementary legends.pdf
- Supplementary table S1.pdf
- Supplemntary figure S1.jpg
- Supplemntary figure S2.jpg
- Supplemntary figure S3.jpg
- Supplemntary figure S4.jpg
- Supplemntary figure S5.jpg
